# Supplementary material for: TAp73β Can Promote Hepatocellular Carcinoma Dedifferentiation
Source: MDPI journal article supplement (doi:10.3390/cancers13040783), 2021-02-13

Figure 1D

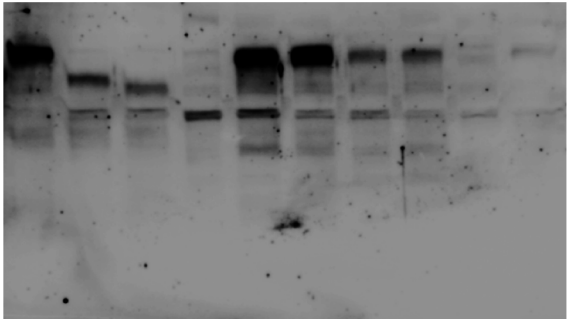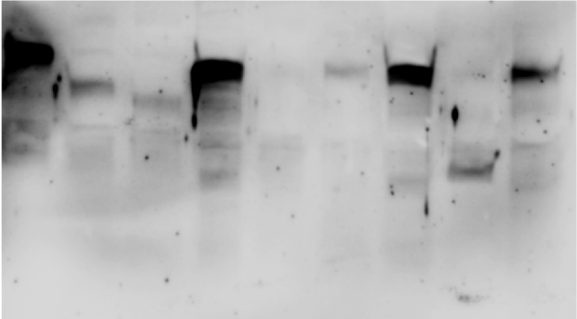

Antibody=ab: FLp73

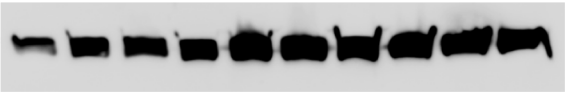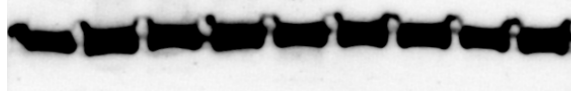

Antibody=ab: Beta-actin

Figure 2

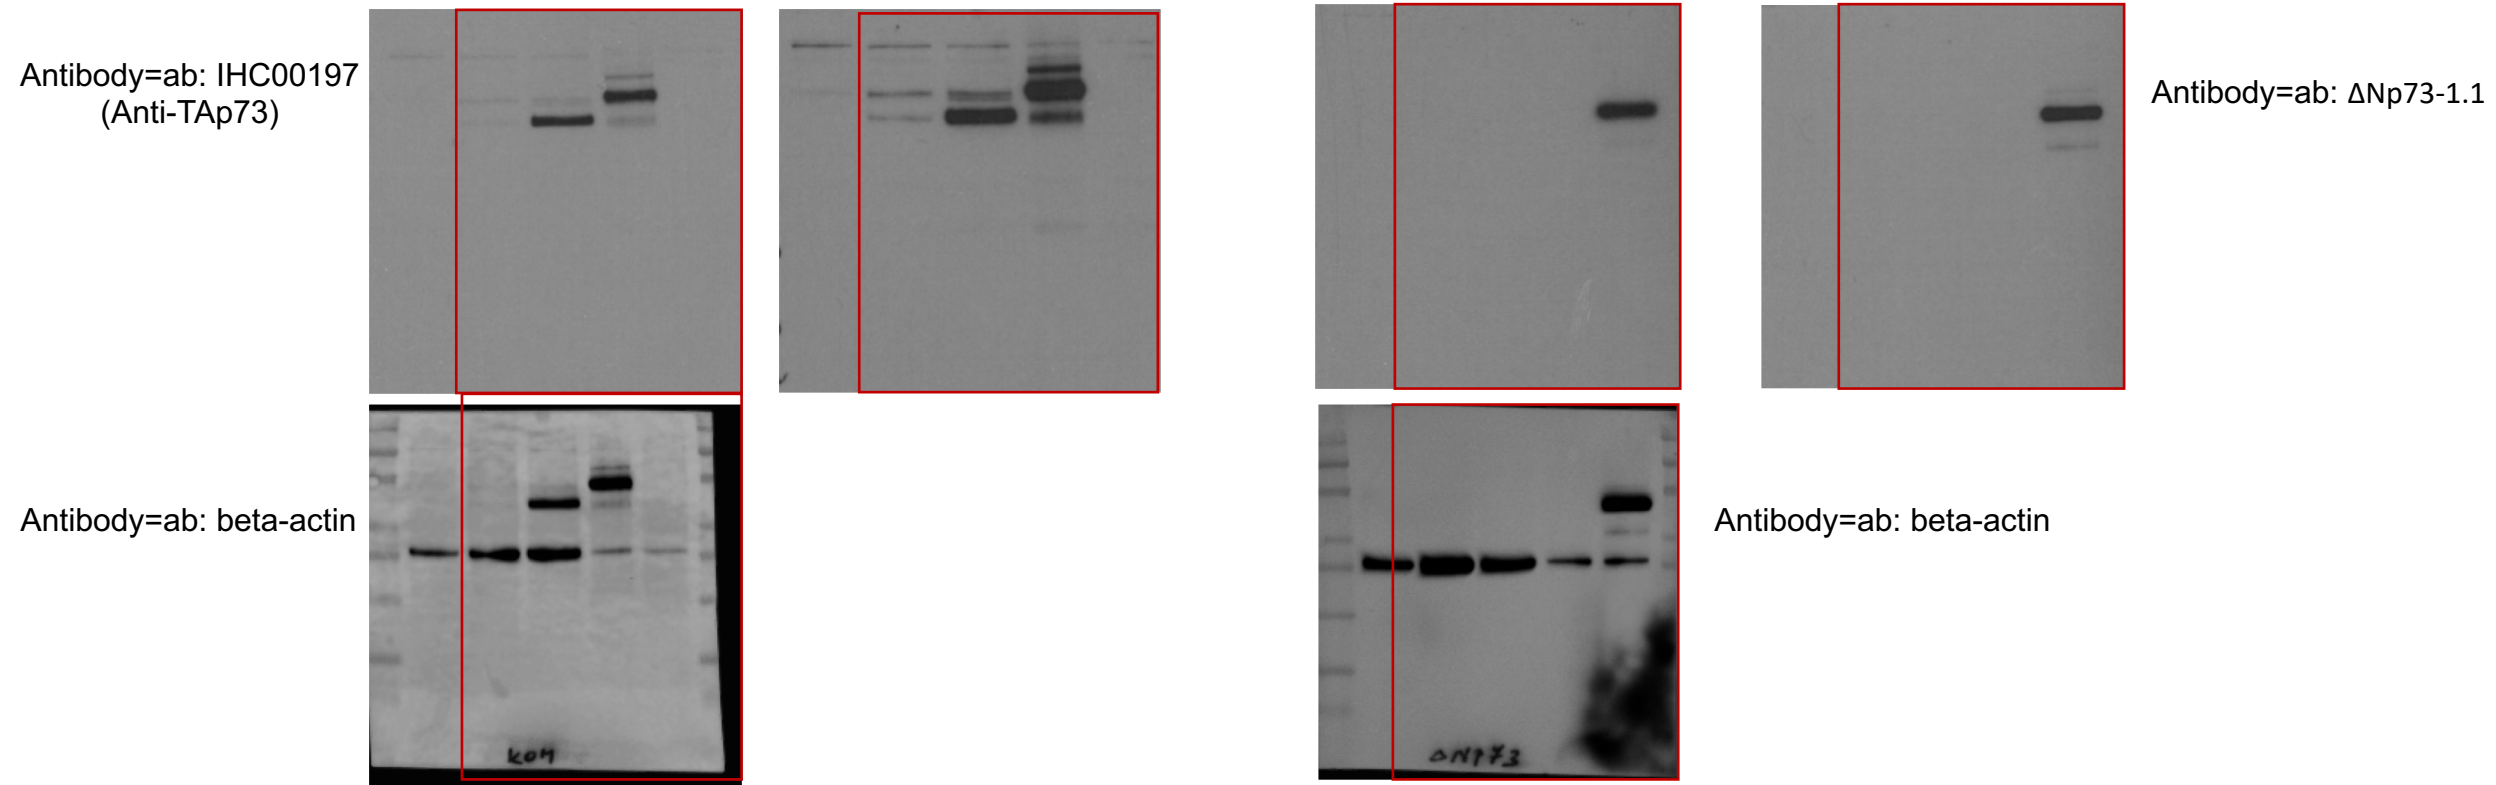

Fig. 4A

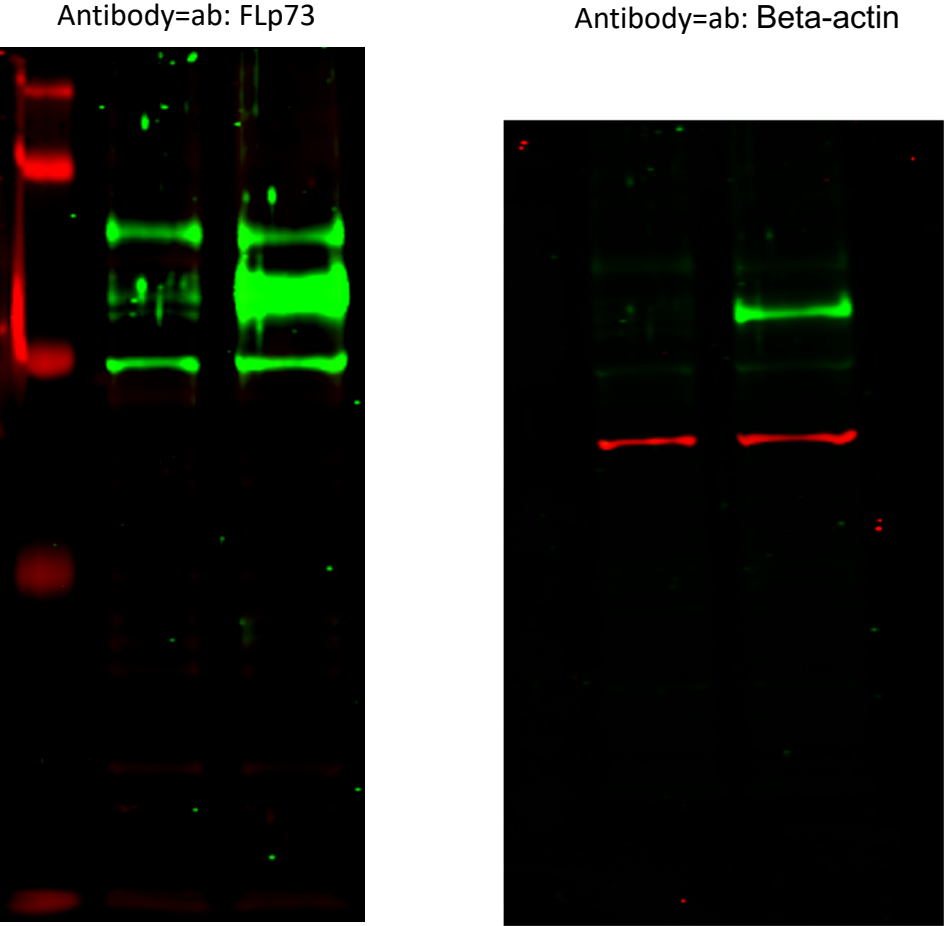

Fig. 4A (continued)

Antibody=ab: Bax

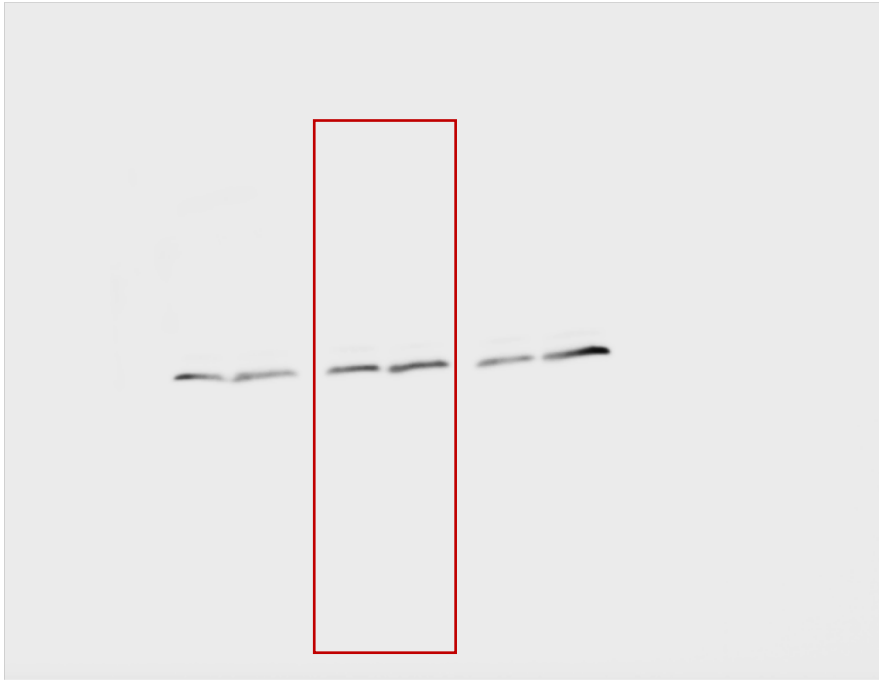

Antibody=ab: Beta-actin

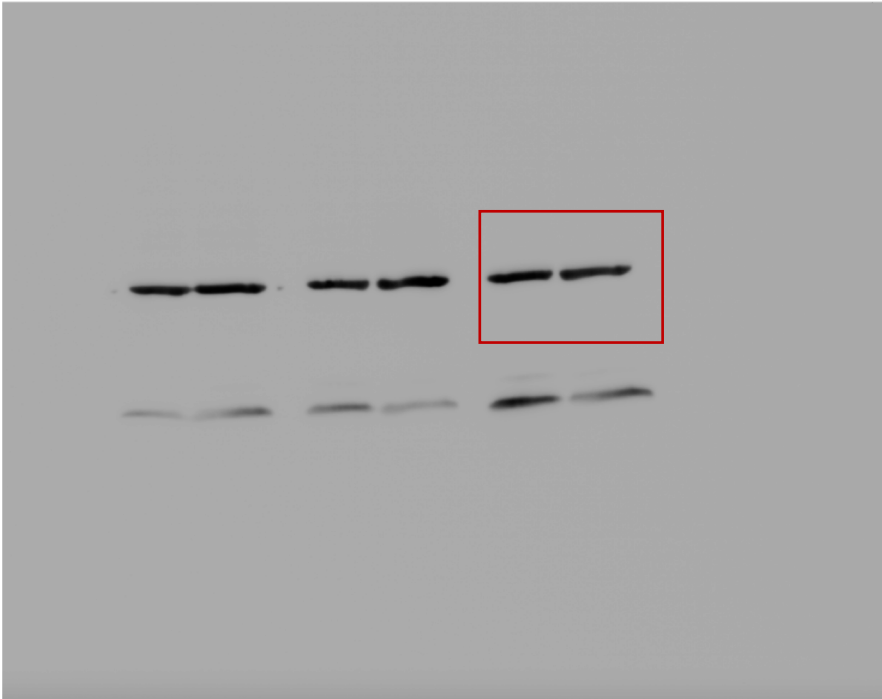



Fig. 4A (contiuned)

Antibody=ab: YAP/TAZ

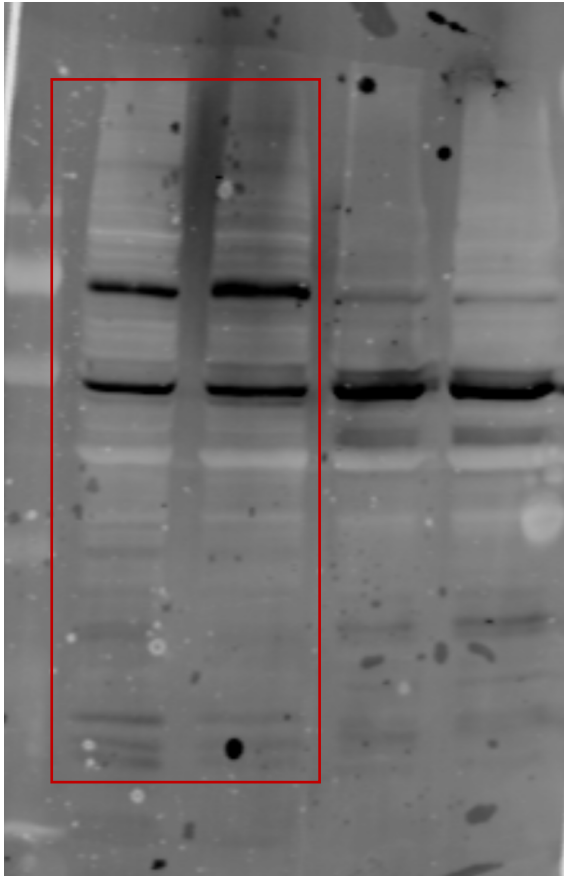

Antibody=ab: Beta-actin

Antibody=ab: Calnexin

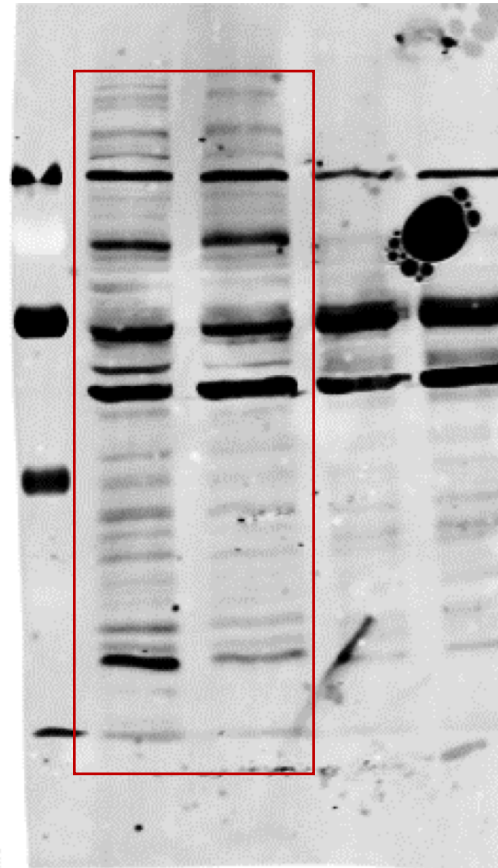

Fig.5A

Antibody=ab: Jagged 1

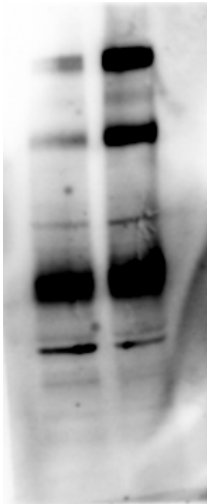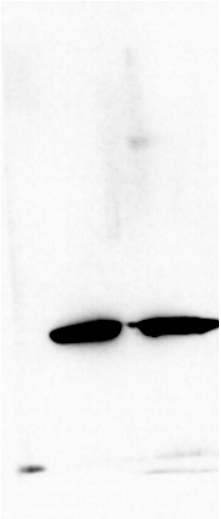

Antibody=ab: Beta-actin

Antibody=ab: NOTCH1

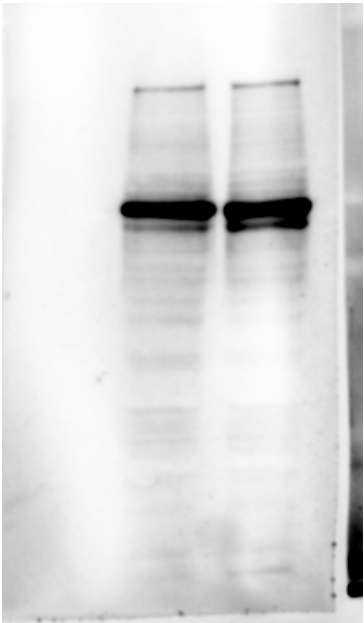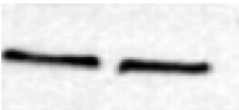

Antibody=ab: Beta-actin

Antibody=ab: CFTR

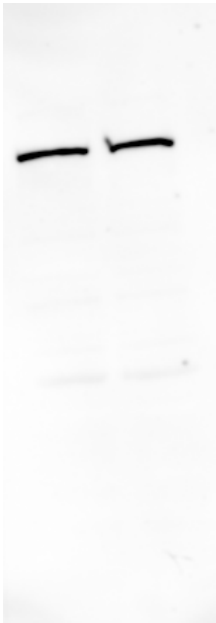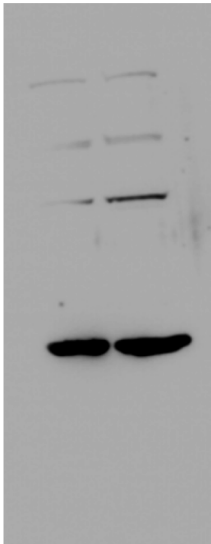

Antibody=ab: Beta-actin

Antibody=ab: ZO-1

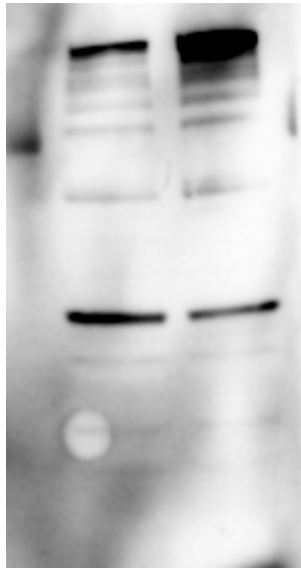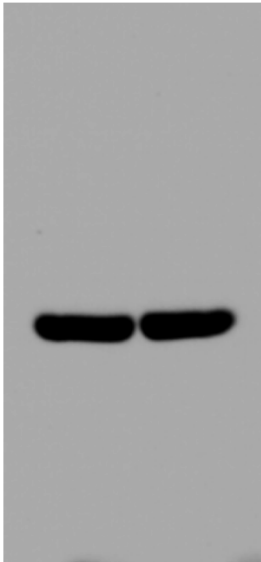

Antibody=ab: Beta-actin

Antibody=ab: HNF1B

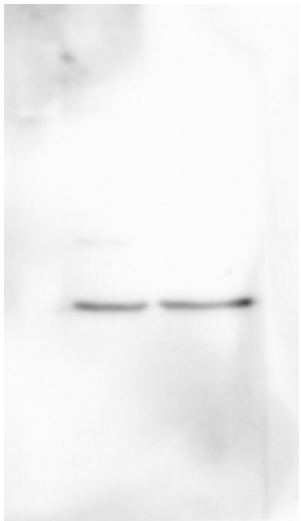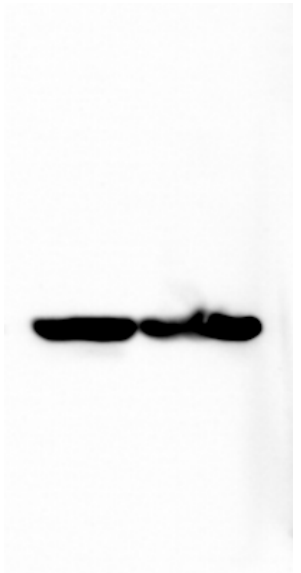

Antibody=ab: Beta-actin

Fig.5C

Antibody=ab: EpCAM

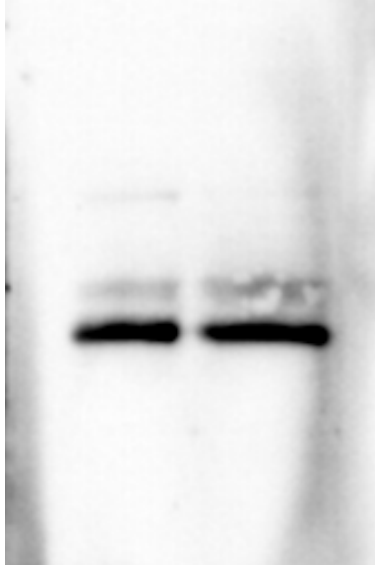

Antibody=ab: LGR5

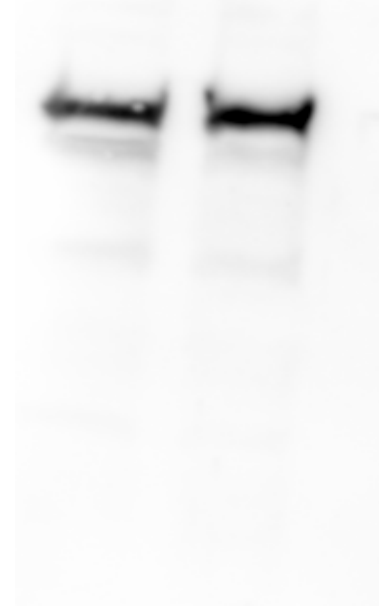

Antibody=ab: Beta-actin

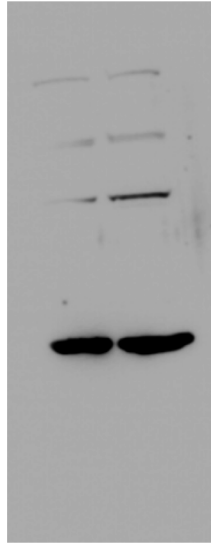

Antibody=ab: Beta-actin

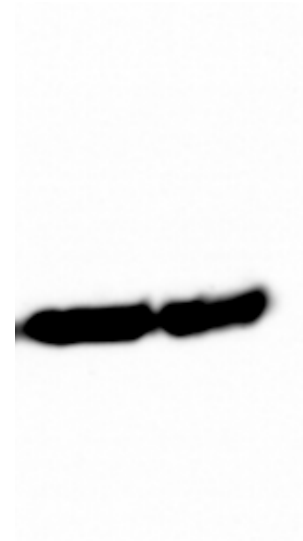

Fig.5D

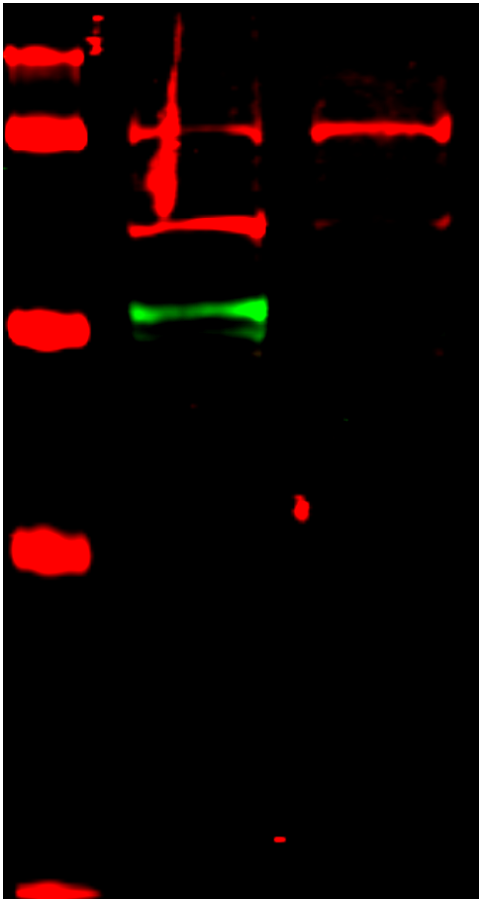

Antibody=ab: ALB

Antibody=ab: HNF4a

Antibody=ab: Beta-actin

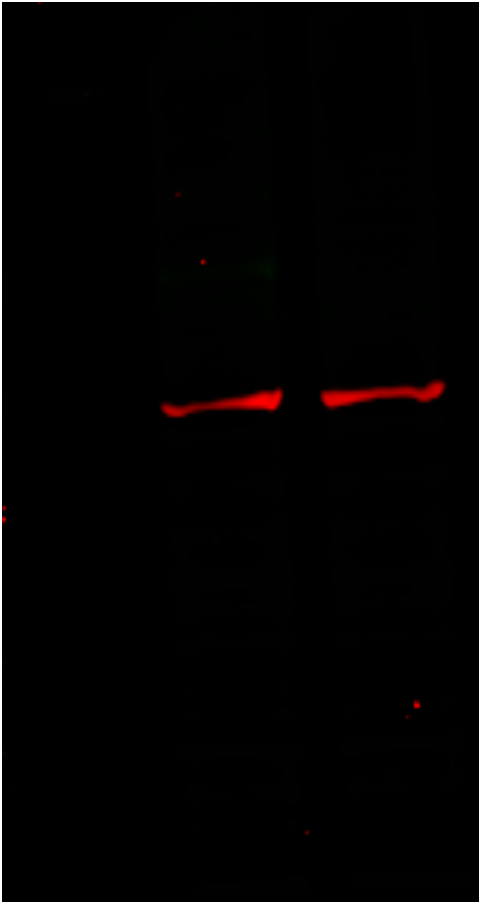

Figure 5 E

Antibody=ab: FLp73

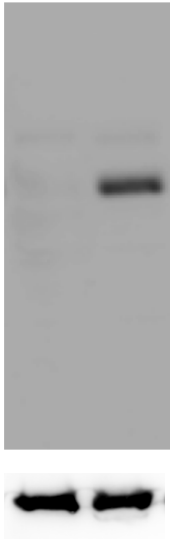

Antibody=ab: Beta-actin

Antibody=ab: HNF4A

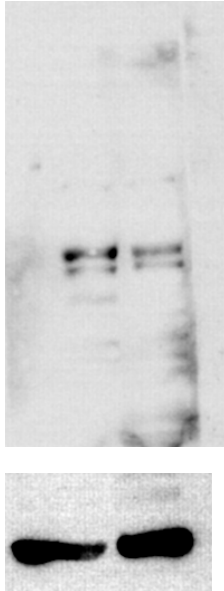

Antibody=ab: Beta-actin

Antibody=ab: ALB

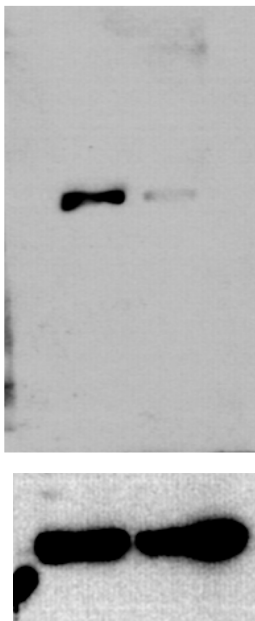

Antibody=ab: Beta-actin

Figure 5F

Antibody=ab: FLp73

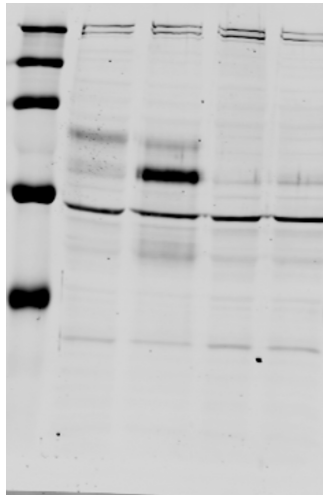

Antibody=ab: Beta-actin

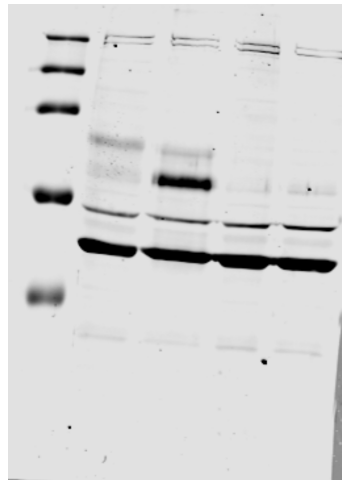

Antibody=ab: ALB

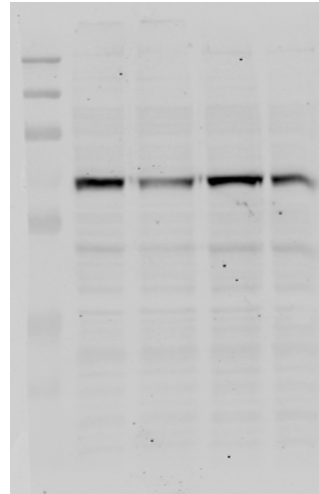

Antibody=ab: HNF4A

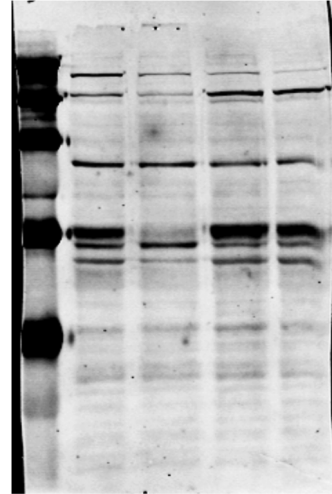

Antibody=ab: Beta-actin

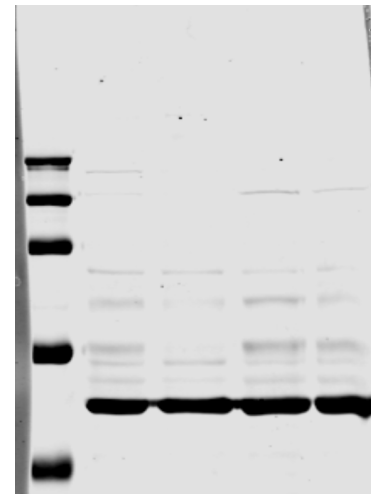

Supplement: s1 [file s1]
